# Supplementary material
Source: Royal Society of Chemistry journal article supplement (doi:10.1039/d6nj00338a)
Supplement: d6nj00338a1.pdf [file d6nj00338a1.pdf]

## Supporting Information

### **Sequentially Electrodeposited Fe<sub>6</sub>Ni/FeNi<sub>6</sub> NiFe Hydroxide/LDH-Like Double-Layer Electrode for Efficient Oxygen Evolution Reaction**

*Wenxu Wang<sup>a</sup>, Xiaotian Zhao<sup>a</sup>, Qiang Liu<sup>b</sup>, Mengjie Bai<sup>a</sup>, Chuancheng Liang<sup>a</sup>, Xia  
Li<sup>a</sup>, Yiqing Jiao<sup>a</sup>, Zhihao Fang<sup>a,c\*</sup>, Yongwei Li<sup>a</sup> and Yan Zhou<sup>a</sup>*

<sup>a</sup> Shandong Engineering Research Center of New Energy Materials and Devices,  
Weifang University of Science and Technology, Weifang 262700, China

<sup>b</sup> Jinan Xinyuan Material Development and Utilization Co., Ltd

<sup>c</sup> Shandong Solid New Material Technology Co.,Ltd, Weifang 262700, China

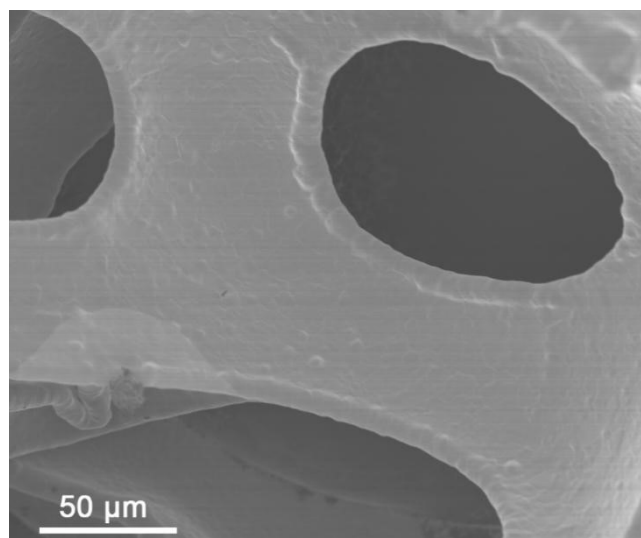

**Figure S1** SEM image of blank NF.

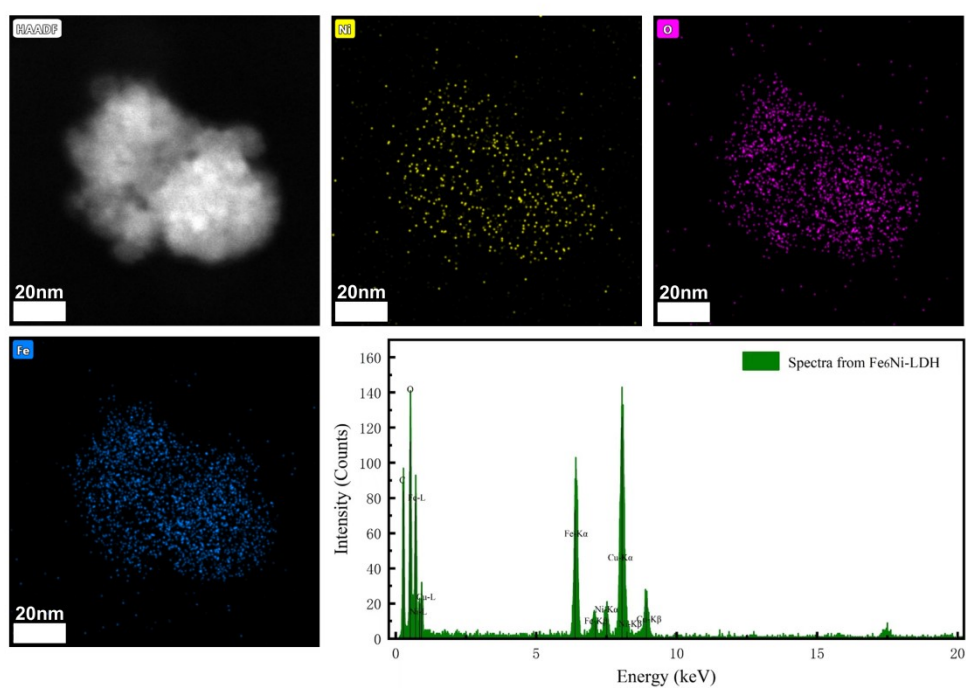

**Figure S2** Plan-view TEM image and corresponding EDX elemental mapping of the as-prepared Fe<sub>6</sub>Ni sample.

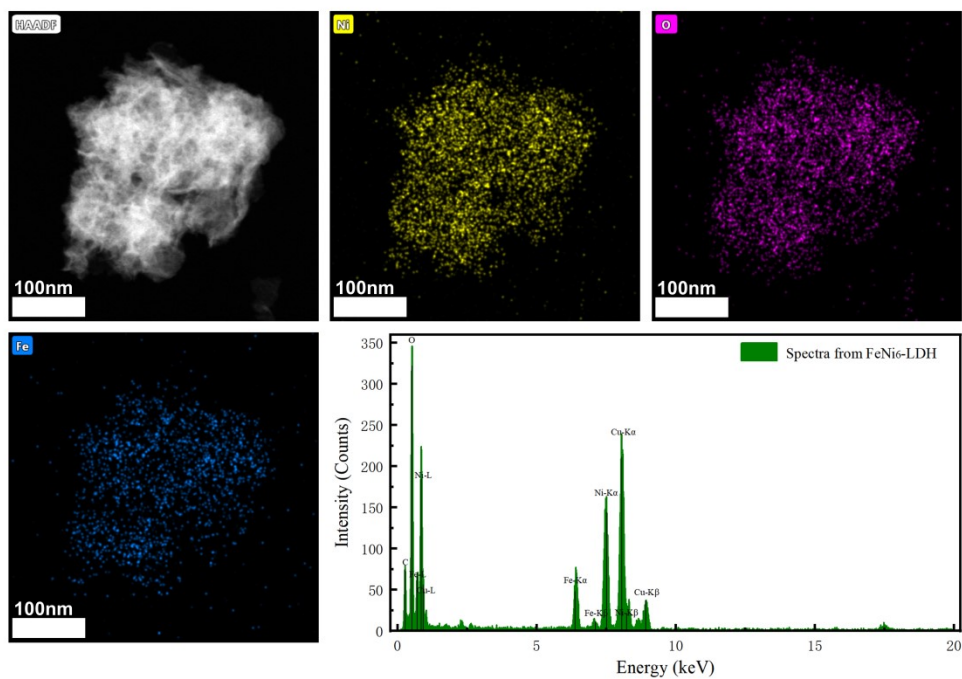

**Figure S3** A typical TEM EDX-mapping of as-prepared FeNi<sub>6</sub> LDH.

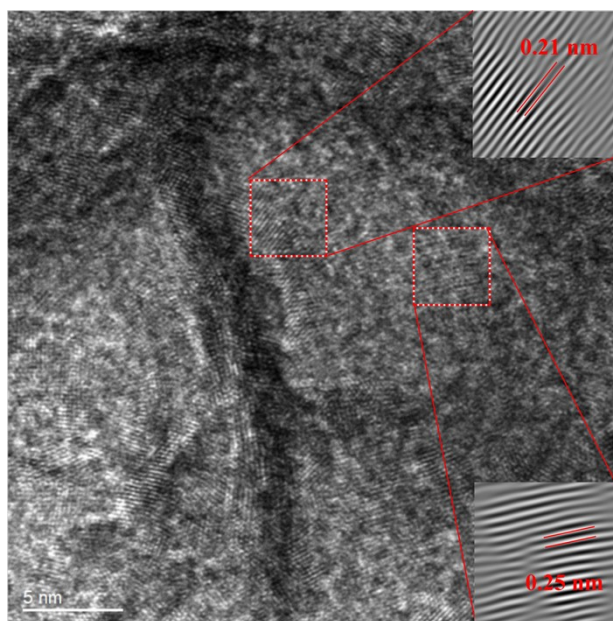

**Figure S4** HRTEM image of Fe<sub>6</sub>Ni@FeNi<sub>6</sub> LDH showing locally resolved lattice fringes with interplanar spacings of approximately 0.25 and 0.21 nm, consistent with the (012) and (015) planes of NiFe LDH.

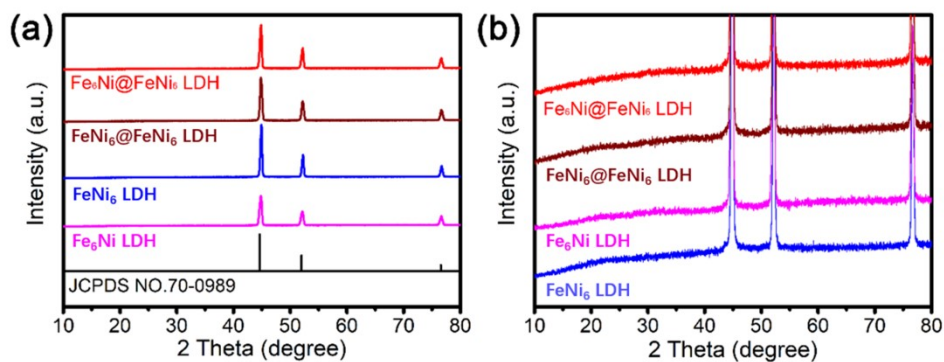

**Figure S5** XRD patterns of the electrodeposited NiFe hydroxide/LDH-like samples on Ni foam.

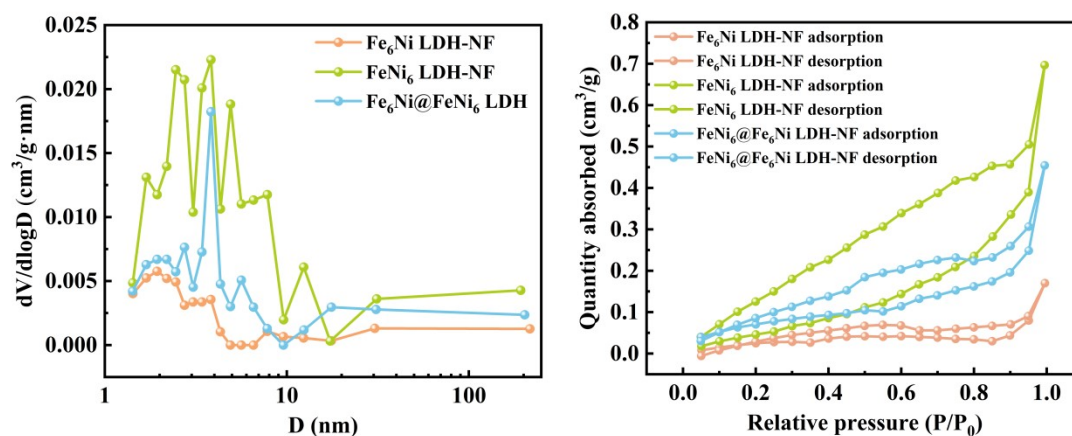

**Figure S6** Nitrogen adsorption-desorption isotherms and pore size distribution curves of NiFe LDH catalysts on Ni foam.

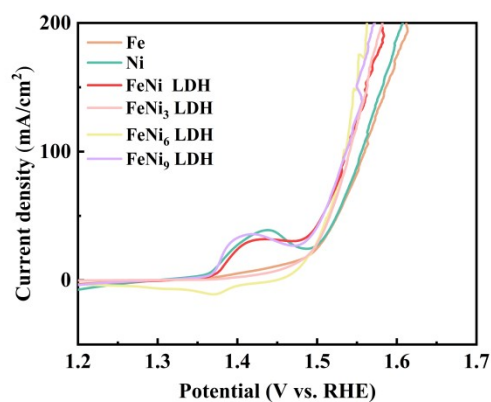

**Figure S7** OER performance in 1 M KOH: LSV curves comparing single-layer and double-layer

deposited FeNi LDH materials.

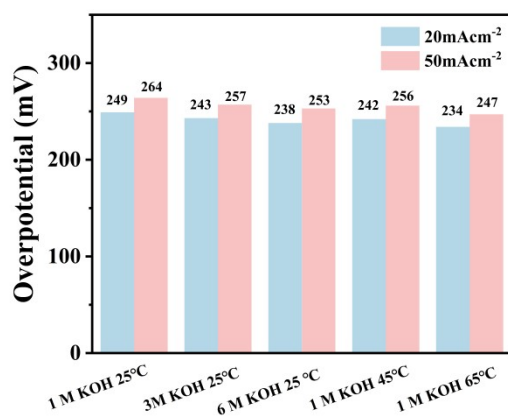

**Figure S8** Comparison of the overpotentials of Fe<sub>6</sub>Ni@FeNi<sub>6</sub> LDH required to reach current densities of 20 and 50 mA cm<sup>-2</sup> under different alkaline concentrations and temperatures.

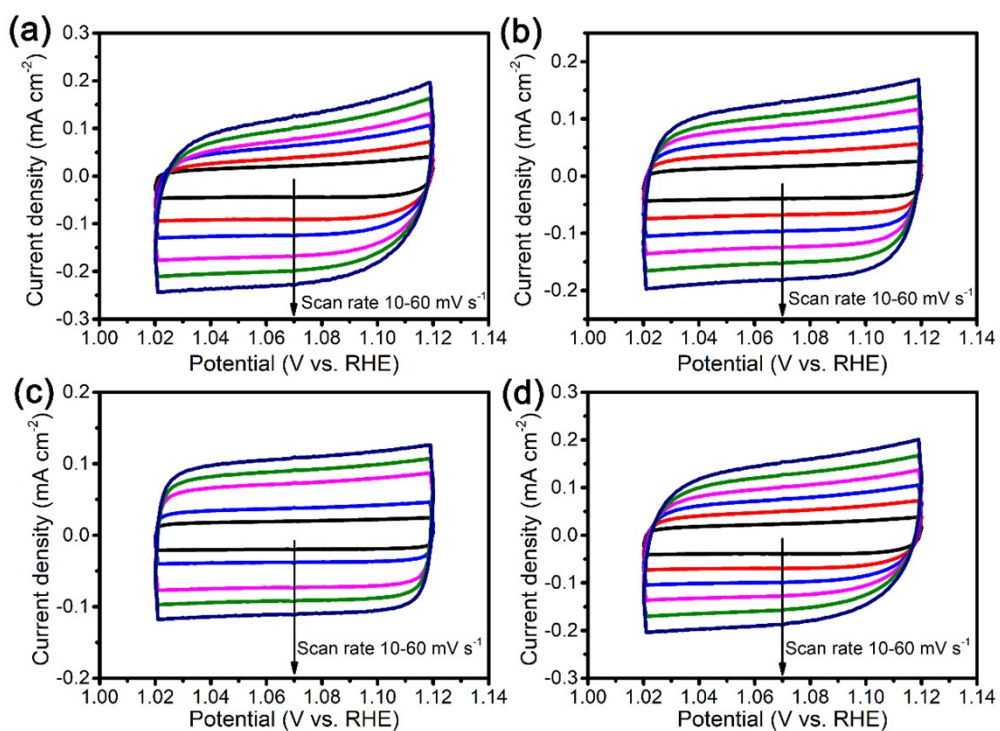

**Figure S9** CVs of FeNi<sub>6</sub> LDH, Fe<sub>6</sub>Ni LDH, FeNi<sub>6</sub>@FeNi<sub>6</sub> LDH and Fe<sub>6</sub>Ni@FeNi<sub>6</sub> LDH.

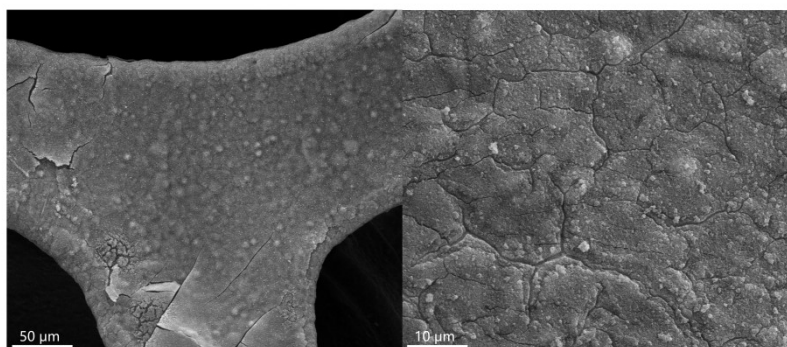

**Figure S10** SEM images of Fe<sub>6</sub>Ni@FeNi<sub>6</sub> LDH after 24 h chronopotentiometric OER testing at

20 mA cm<sup>-2</sup> in 1 M KOH.

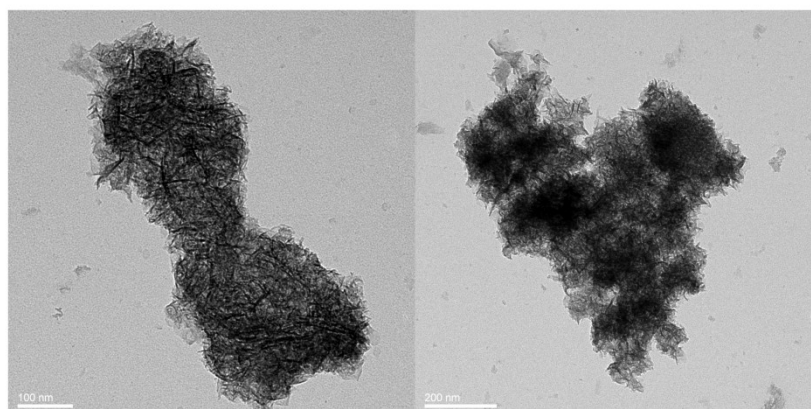

**Figure S11** TEM images of Fe<sub>6</sub>Ni@FeNi<sub>6</sub> LDH after 24 h chronopotentiometric OER testing at 20 mA cm<sup>-2</sup> in 1 M KOH.

**Table S1** BET surface area and porosity parameters of NiFe LDH catalysts.

| Sample                                   | Specific surface area (m <sup>2</sup> /g) | Total pore volume (cm <sup>3</sup> /g) | Average pore diameter (nm) |
|------------------------------------------|-------------------------------------------|----------------------------------------|----------------------------|
| Fe <sub>6</sub> Ni LDH-NF                | 15.335                                    | 0.017                                  | 2.454                      |
| FeNi <sub>6</sub> LDH-NF                 | 14.314                                    | 0.004                                  | 1.690                      |
| Fe <sub>6</sub> Ni@FeNi <sub>6</sub> LDH | 8.876                                     | 0.009                                  | 1.690                      |

**Table S2** Comparison of OER performance of representative NiFe-based electrocatalysts in 1 M KOH under ambient conditions.

| Materials                                    | OER (mV) | Electrolyte | Current density (mAcm <sup>-2</sup> ) | Ref. |
|----------------------------------------------|----------|-------------|---------------------------------------|------|
| FeNi                                         | 313      | 1 M KOH     | 20                                    | [1]  |
| Pd/NiFe-LDH-u                                | 267      | 1 M KOH     | 20                                    | [2]  |
| NiFe-LDH/CNTs                                | 269      | 1 M KOH     | 20                                    | [3]  |
| RuO <sub>2</sub> /NiFe-LDH/NF                | 319      | 1 M KOH     | 50                                    | [4]  |
| Sulfated NiFe LDH                            | 288      | 1 M KOH     | 50                                    | [5]  |
| Ni/Fe <sub>3</sub> O <sub>4</sub> /NiFe LDH  | 275      | 1 M KOH     | 20                                    | [6]  |
| Co <sub>1.98</sub> -NiFe LDH                 | 266      | 1 M KOH     | 50                                    | [7]  |
| Co <sub>3</sub> O <sub>4</sub> @NiFe LDH     | 270      | 1 M KOH     | 50                                    | [8]  |
| NiCo <sub>2</sub> O <sub>4</sub> @NiFe-LDH-2 | 270      | 1 M KOH     | 50                                    | [9]  |
| NiFe hydroxide                               | 307      | 1 M KOH     | 50                                    | [10] |

|                                          |     |         |    |           |
|------------------------------------------|-----|---------|----|-----------|
| Fe <sub>6</sub> Ni@FeNi <sub>6</sub> LDH | 249 | 1 M KOH | 20 | This work |
| Fe <sub>6</sub> Ni@FeNi <sub>6</sub> LDH | 264 | 1 M KOH | 50 | This work |

1. B. Narayanan, K. Lakshmanan and G. Shanmugavelayutham, *Surf. Interfaces*, **2024**, *46*, 104091.
2. D. Liu, J. Liu, L. Wang, Z. Ma, J. Xing, Y. Yang, B. Xue and F. Li, *Int. J. Hydrog. Energy*, **2024**, *49*, 143-151.
3. Y. Zhang, C. Zhang, Y. Mei, T. Le, H. Shao, H. Jiang, Y. Feng and J. Hu, *Int. J. Hydrog. Energy*, **2022**, *47*, 36831-36842.
4. Q. Chen, Z. Kang, S. Luo, J. Li, P. Deng, C. Wang, Y. Hua, S. Zhong and X. Tian, *Int. J. Hydrog. Energy*, **2023**, *48*, 8888-8897.
5. C. Qiao, Z. Usman, T. Cao, S. Rafai, Z. Wang, Y. Zhu, C. Cao and J. Zhang, *Chem. Eng. J.*, **2021**, *426*, 130873.
6. C. He, X. Kong, M. Jiang and X. Lei, *Mater. Lett.*, **2018**, *222*, 138-141.
7. Y. Yang, S. Wei, Y. Li, D. Guo, H. Liu and L. Liu, *Appl. Catal. B Environ.*, **2022**, *314*, 121491.
8. Z. H. Liu, H. F. Yuan, Z. H. Wan, Z. Z. Ma, X. Y. Deng and X. G. Wang, *J. Alloy. Compd.*, **2024**, *983*, 173837.
9. M. Yan, Y. Zeng, *J. Alloy. Compd.*, **2023**, *931*, 167650.
10. Y. N. Zhou, W. L. Yu, Y. N. Cao, J. Zhao, B. Dong, Y. Ma, F. L. Wang, R. Y. Fan, Y. L. Zhou and Y. M. Chai, *Appl. Catal. B Environ.*, **2021**, *292*, 120150.
